# Supplementary material for: Edge AI Model Deployed for Real-Time Detection of Atrial Fibrillation Risk during Sinus Rhythm
Source: MDPI journal article supplement (doi:10.3390/jcm13082218), 2024-04-11
Supplement: s1 [file s1]

**Table S1.** The arrhythmia exclusion list.

|                                                   |                                 |
|---------------------------------------------------|---------------------------------|
| Second-degree Atrioventricular Block (Wenckebach) | PAC Trigeminy                   |
| Complete Atrioventricular Block                   | PVC Trigeminy                   |
| Second-degree Atrioventricular Block (Mobitz)     | Frequent PAC                    |
| Second-degree Atrioventricular (2:1)              | Frequent PVC                    |
| Artificial Pacemaker Rhythm                       | PAC Bigeminy                    |
| Suspected Left Atrial Rhythm                      | PVC Bigeminy                    |
| Atrioventricular Junctional Rhythm                | Sinoatrial (S-A) Block          |
| Atrioventricular Dissociation                     | Supraventricular Tachycardia    |
| Tachycardia                                       | Short Runs of PAC               |
| Bradycardia                                       | Ventricular Tachycardia         |
| Extreme Tachycardia                               | Short Runs of PVC               |
| Extreme Bradycardia                               | Ventricular Rhythm              |
| Escape Beat                                       | Couplet PAC                     |
| Premature Atrial Contraction (PAC)                | Couplet PVC                     |
| Premature Ventricular Contraction (PVC)           | Atrial Fibrillation and Flutter |
